# Supplementary material for: Base editing strategy allows insertion of the A673T mutation in APP gene to prevent the development of Alzheimer’s disease
Source: bioRxiv or medRxiv preprint supplement (doi:10.1101/2020.10.27.357830), 2020-10-27
Supplement: Supplementary file [file media-1.pdf]

## SUPPLEMENTAL RESULTS:

Table S1: List of sgRNA used in the study.

|                                                                           |                        |
|---------------------------------------------------------------------------|------------------------|
| SpCas9 VQR/EQR sgRNAs targeting sequences of 17 to 22 nucleotides tested: |                        |
| sgRNA 22bp                                                                | ATTCTGCATCCATCTTCACTTC |
| sgRNA 21bp                                                                | TTCTGCATCCATCTTCACTTC  |
| sgRNA 20bp                                                                | TCTGCATCCATCTTCACTTC   |
| sgRNA 19bp                                                                | CTGCATCCATCTTCACTTC    |
| sgRNA 18bp                                                                | TGCATCCATCTTCACTTC     |
| sgRNA 17bp                                                                | GCATCCATCTTCACTTC      |
| SaCas9 sgRNAs tested:                                                     |                        |
| sgRNA 22bp                                                                | ATTCTGCATCCATCTTCACTTC |
| sgRNA 21bp                                                                | TTCTGCATCCATCTTCACTTC  |
| sgRNA 20bp                                                                | TCTGCATCCATCTTCACTTC   |
| sgRNA 19bp                                                                | CTGCATCCATCTTCACTTC    |
| sgRNA 18bp                                                                | TGCATCCATCTTCACTTC     |
| sgRNA 17bp                                                                | GCATCCATCTTCACTTC      |

Table S2: Example of Deep-Sequencing analysis.

|                | Target-AID-SpCas9nVQR 19 | BE3_SpCas9nVQR 19 |
|----------------|--------------------------|-------------------|
| Total reads    | 100%                     | 100%              |
| Wild-Type      | 31,8                     | 66,0              |
| C1             | 3,8                      | 1,0               |
| C2             | 3,0                      | 0,3               |
| C3             | 0,1                      | 3,6               |
| C4             | 0,3                      | 0,0               |
| C5             | 0,8                      | 0,3               |
| C1+C2          | 26,2                     | 0,0               |
| C1+C3          | 0,2                      | 2,1               |
| C1+C4          | 0,2                      | 0,0               |
| C1+C5          | 0,2                      | 0,0               |
| C2+C3          | 0,1                      | 0,2               |
| C2+C4          | 0,1                      | 0,0               |
| C2+C5          | 0,2                      | 0,0               |
| C3+C4          | 0,1                      | 0,2               |
| C3+C5          | 0,0                      | 0,2               |
| C4+C5          | 0,0                      | 0,0               |
| C1+C2+C3       | 2,0                      | 1,0               |
| C1+C2+C4       | 1,6                      | 0,0               |
| C1+C2+C5       | 4,2                      | 0,0               |
| C2+C4+C5       | 0,0                      | 0,0               |
| C2+C3+C5       | 0,0                      | 0,0               |
| C1+C2+C3+C4    | 0,1                      | 0,1               |
| C2+C3+C4+C5    | 0,3                      | 0,2               |
| C1+C3+C4+C5    | 0,0                      | 0,0               |
| C1+C2+C4+C5    | 0,0                      | 0,1               |
| C1+C2+C3+C5    | 0,2                      | 0,0               |
| C1+C2+C3+C4+C5 | 0,3                      | 0,2               |
| Total          | 75,60%                   | 75,70%            |
| Mis-sequencing | 24,40%                   | 24,30%            |

Table S3: Percentage of reduction of amyloid- $\beta$  peptides 40 and 42 induced by the addition of the A673T mutation to wild type APP gene or to an APP gene containing the London mutation or containing a C1 deamination (E674K). The addition of the A673T mutation reduced the production of A $\beta$ 40 and A $\beta$ 42 peptides in all 3 situations.

| FAD mutation         | Wild-Type | V717I (London) | A673T+E674 K (C1+C2) |
|----------------------|-----------|----------------|----------------------|
| Abeta42 Decrease (%) | -46       | -65            | -53                  |
| Abeta40 Decrease (%) | -63       | -81            | -44                  |

Figure S1.

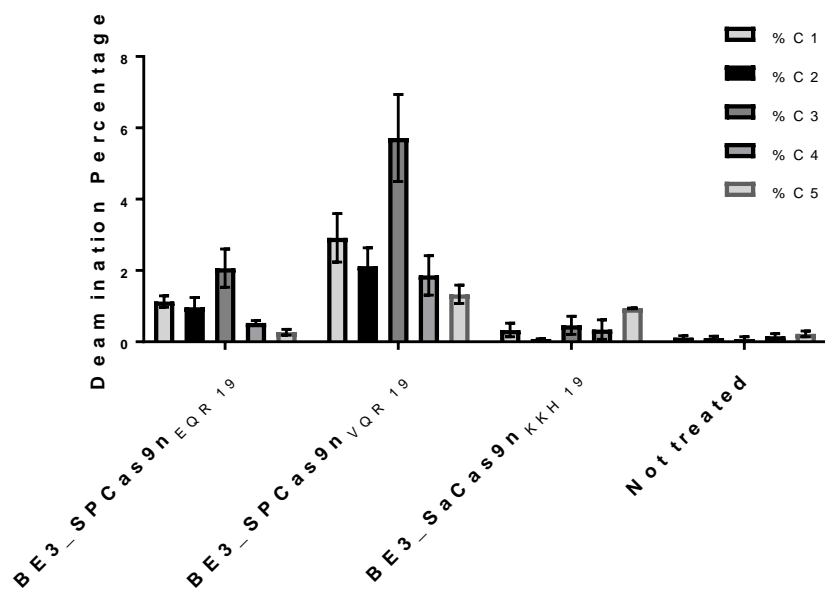

Figure S1: Percentages of cytidine deamination produced by various enzymes and sgRNAs. BE3\_SpCas9nEQR, BE3\_SpCas9nVQR, BE3\_SaCas9nKKH enzymes test in SH-SY5Y cells. The figure illustrates the means +/- SEM (n=4).

Figure S2.

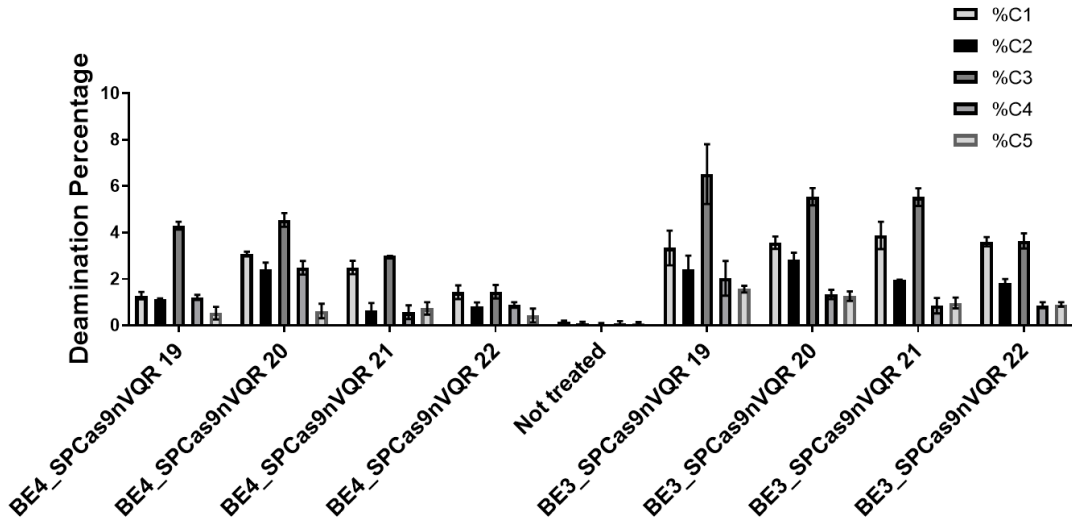

Figure S2: Percentages of cytidine deamination produced by various enzymes and sgRNAs.

BE4\_SpCas9nVQR and BE3\_SpCas9nVQR enzymes test in SH-SY5Y cells. The figure illustrates the means  $\pm$  SEM (n=3).

Figure S3.

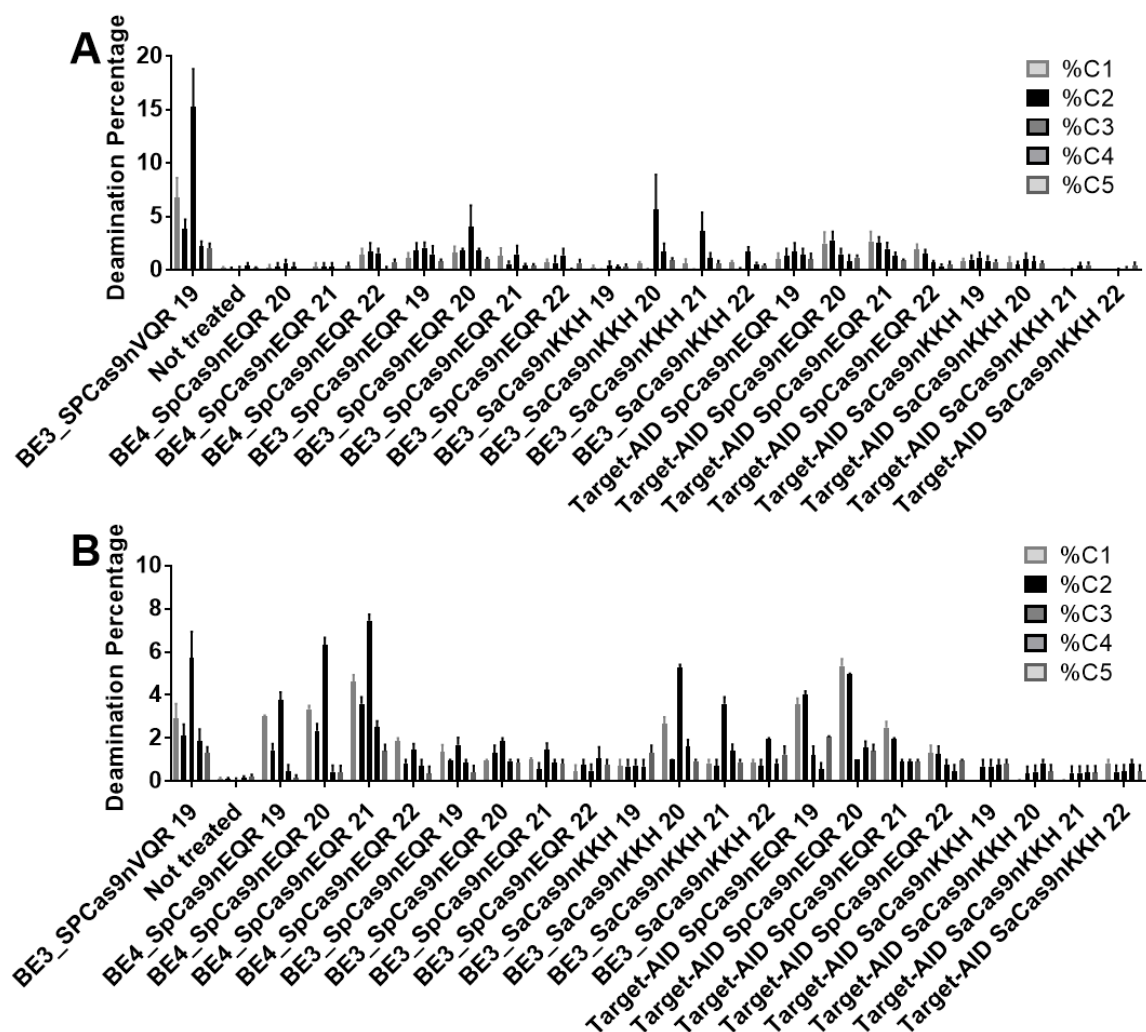

Figure S3: Percentages of cytosine deamination produced by BE3\_SpCas9nVQR, BE4\_SpCas9nVQR, BE3\_SpCas9nVQR, BE3\_SaCas9nKKH, Target-AID\_SpCas9nVQR, Target-AID\_SaCas9nKKH enzymes. In **A**, test in HEK293T cells. In **B**, test in SH-SY5Y. The figure illustrates the means  $\pm$  SEM (n=3).

Figure S4.

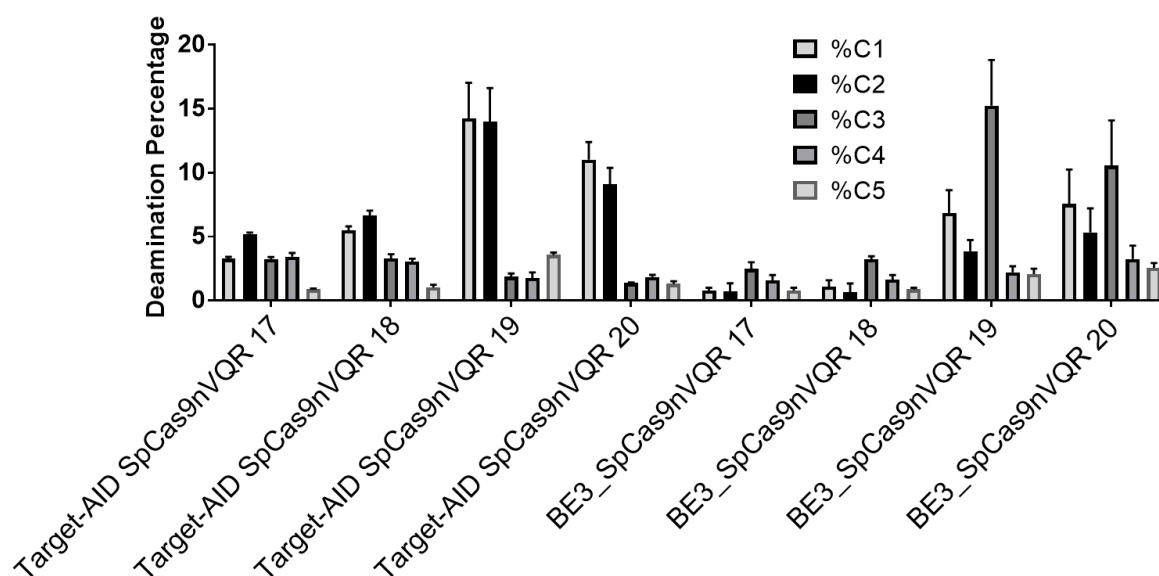

Figure S4: **Deamination efficiencies using various Cas9n-deaminases and sgRNAs targeting various numbers of nucleotides.** The difference of deamination in HEK293T cells of cytidines C1 to C5 produced by the Target-AID-SpCas9nVQR and BE3\_SpCas9nVQR enzymes and two copies of a sgRNA targeting 17 to 20 nucleotides. The figure illustrates the means  $\pm$  SEM (n=3).

Figure S5

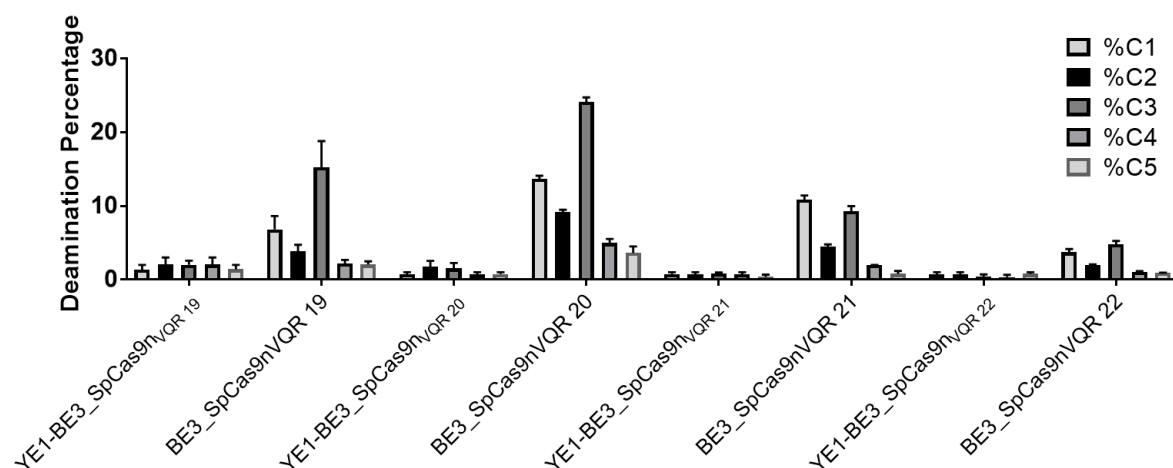

Figure S5: **Deamination efficiencies using various Cas9n-deaminases and sgRNAs targeting various numbers of nucleotides.** Difference between YE1-BE3\_SpCas9nVQR and BE3\_SpCas9nVQR in HEK293T cells. The figure illustrates the means  $\pm$  SEM (n=4).

Figure S6:

Off-Target Sites ×

Copy TSV

| Sequence             | PAM  | Score ▼ | Gene                     | Locus            |
|----------------------|------|---------|--------------------------|------------------|
| CTGCATCCATCTTCACTTC  | AGAG | 100.0   | APP (ENSG00000142192)    | chr21:+25897633  |
| CTGAAGCCATCTTCACTTC  | GGAG | 1.4     |                          | chr5:-74133250   |
| CTGCCCTCCATCTTCACTG  | TGAG | 0.5     |                          | chr11:+70758797  |
| CTGCTTCCAACCTTCACTTT | GGAG | 0.5     | SPOCK2 (ENSG00000107742) | chr10:-72059638  |
| CAGGATCCATCTTAACCTTC | TGAG | 0.4     |                          | chr12:-47654519  |
| CTGCTTCCATCTTCTGTTC  | AGAG | 0.4     |                          | chr3:-36729648   |
| CTGCATCCTTCTCCACTTG  | GGAG | 0.4     |                          | chr8:-67603274   |
| CTGAATCAATCTCCACTTC  | AGAG | 0.4     |                          | chr12:-56572869  |
| ATCCATGCATCTTCACTTC  | AGAG | 0.3     |                          | chr11:-20359838  |
| CTGCCCCACCTTCACTTC   | TGAG | 0.3     |                          | chr9:-85398673   |
| CTGCATCCATCTCTCCTTC  | AGAG | 0.3     |                          | chr3:+176747607  |
| CTATTTCATCTTCACTTC   | AGAG | 0.3     |                          | chr9:-21442550   |
| ATGTATCCATCTTCACTGT  | TGAG | 0.1     |                          | chr14:-35505959  |
| TTTCATCCATCTCCACTTT  | AGAG | 0.1     |                          | chr5:-44542656   |
| TTTCATCCATCTTAACCTAC | AGAG | 0.1     |                          | chr10:-120808163 |
| ATCCATCCACCTTCACTTG  | TGAG | 0.1     |                          | chr4:+10179124   |

Figure S6: Off target analysis performed with Benchling.com interface.
